# Supplementary material for: Metabolomics of dates (Phoenix dactylifera) reveals a highly dynamic ripening process accounting for major variation in fruit composition
Source: PubMed Central journal article supplement (PMC4681049; doi:10.1186/s12870-015-0672-5), 2015-12-16

Additional file 4. Abundance profiles of standardized metabolite levels along DS2-mature samples arranged by increasing PC1 scores. Shown within their respective classes

### primary amines

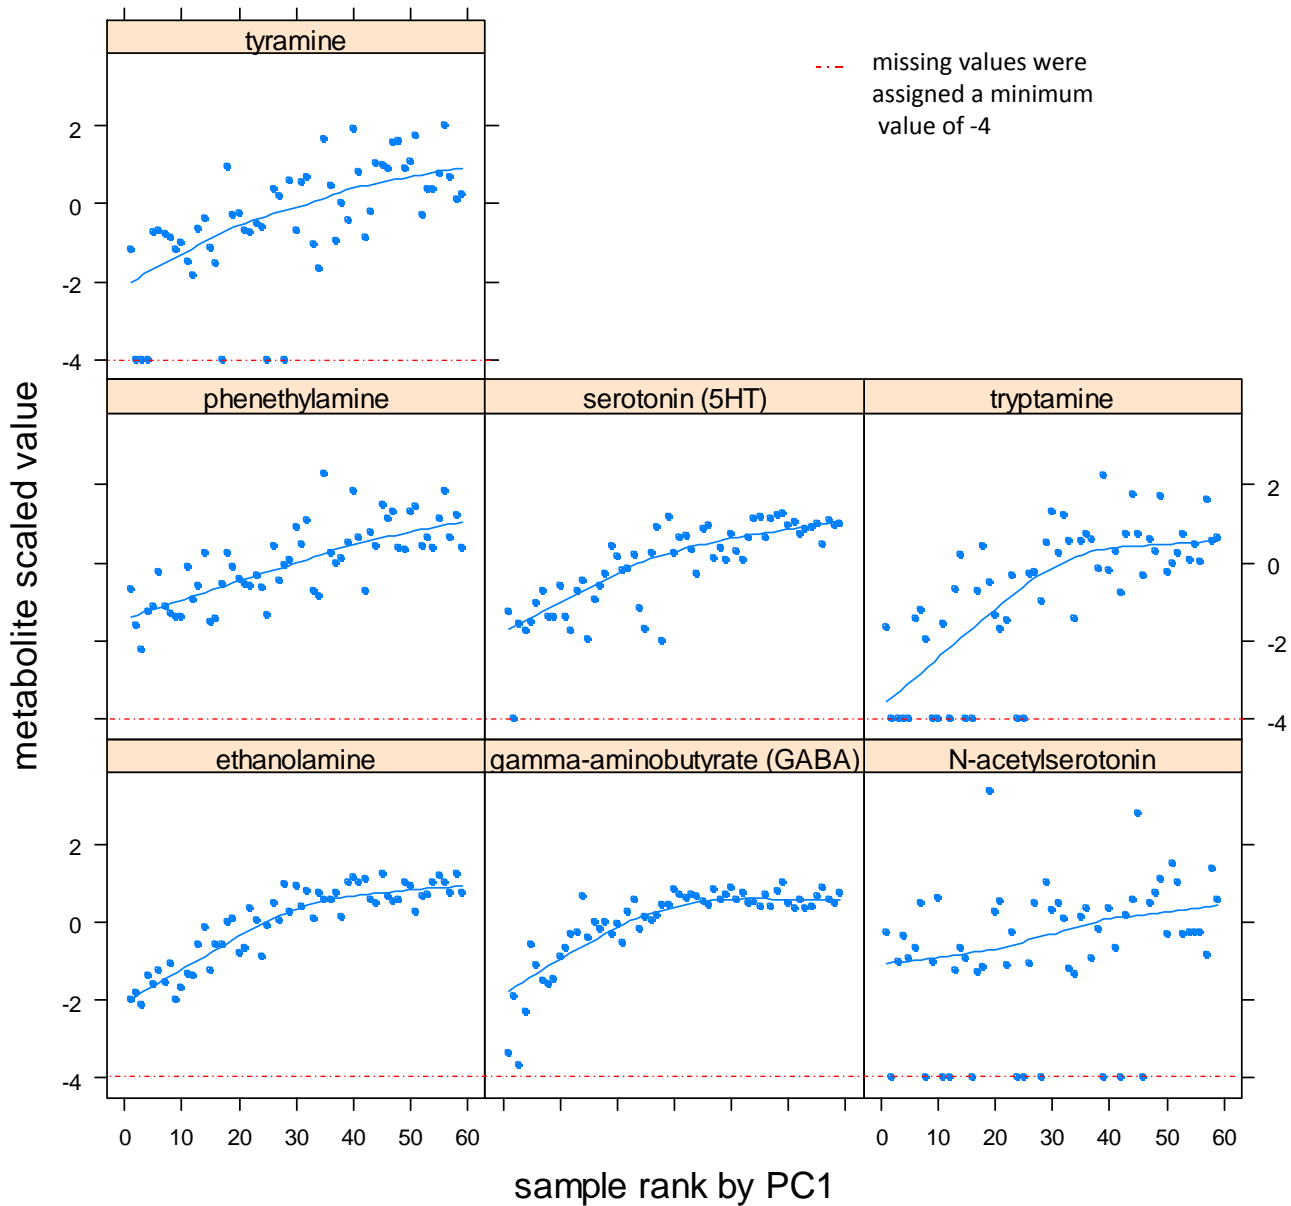

--- missing values were assigned a minimum value of -5.8

## amino acids

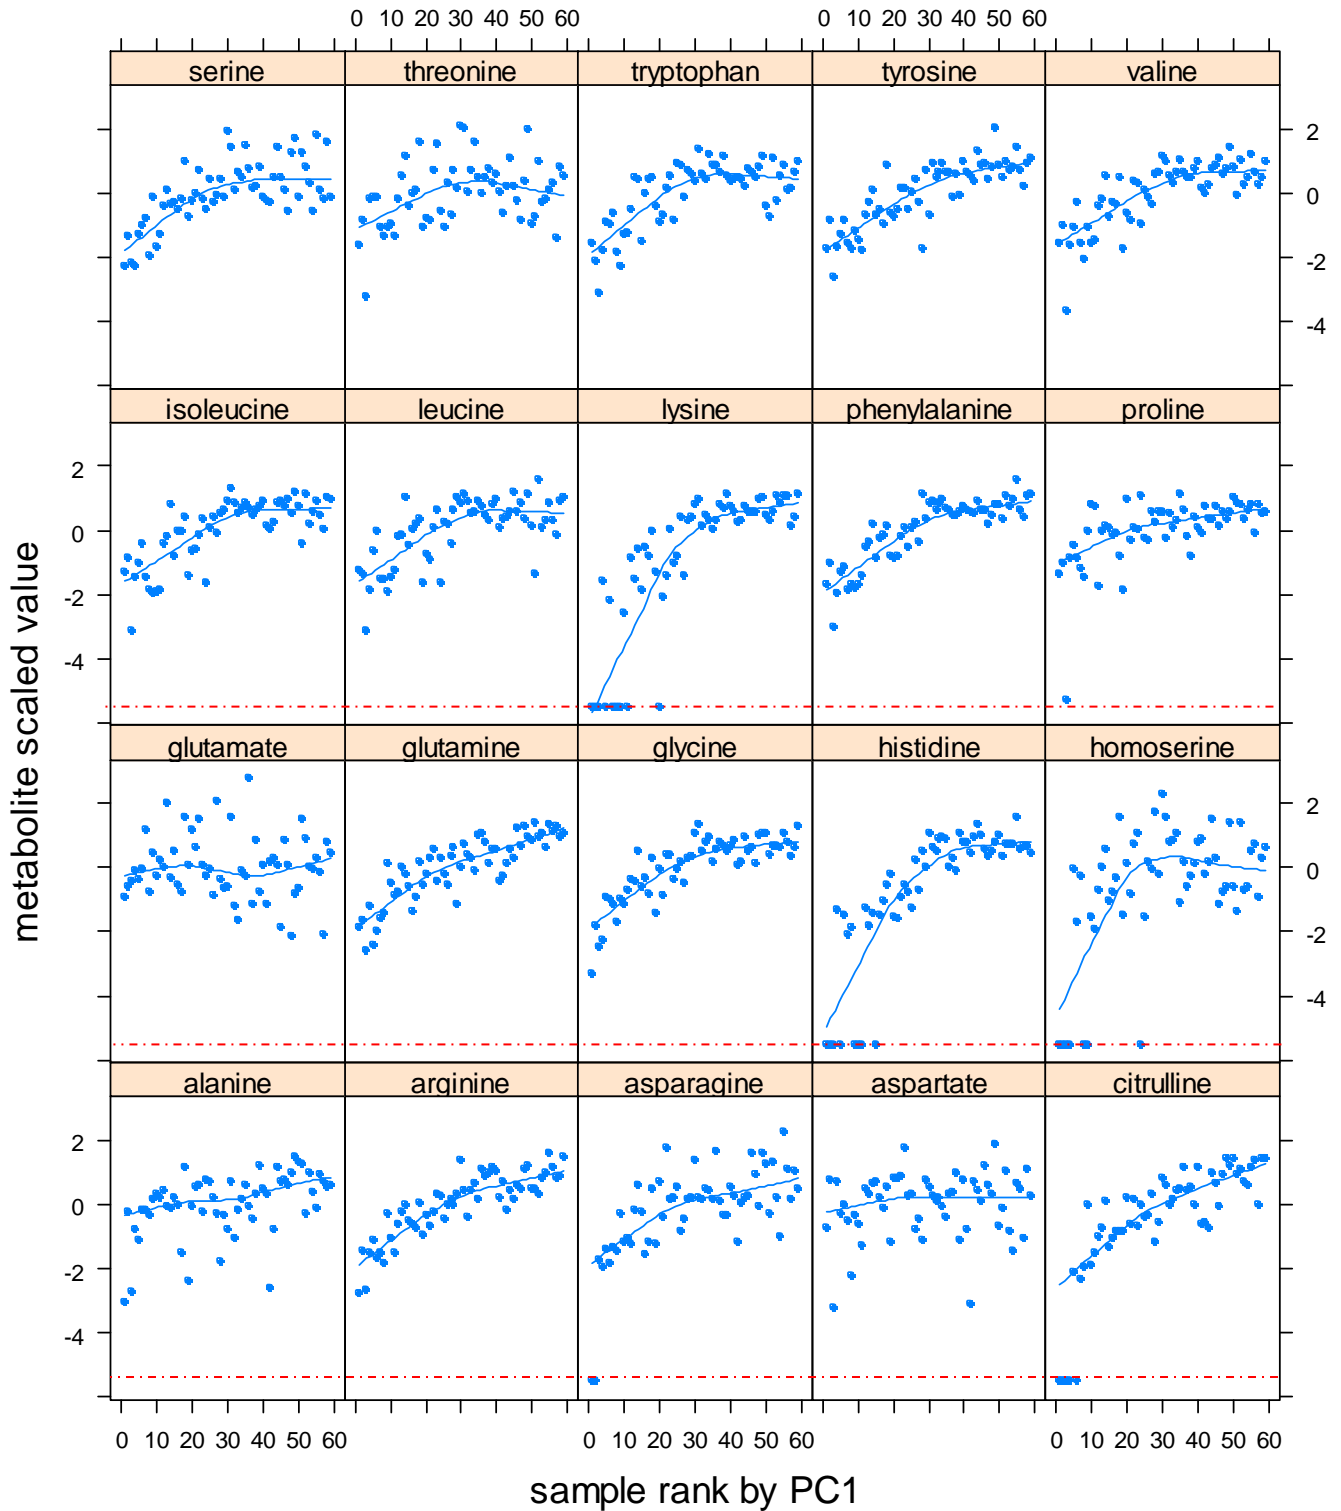

# glutathione cycle and glutathione metabolism

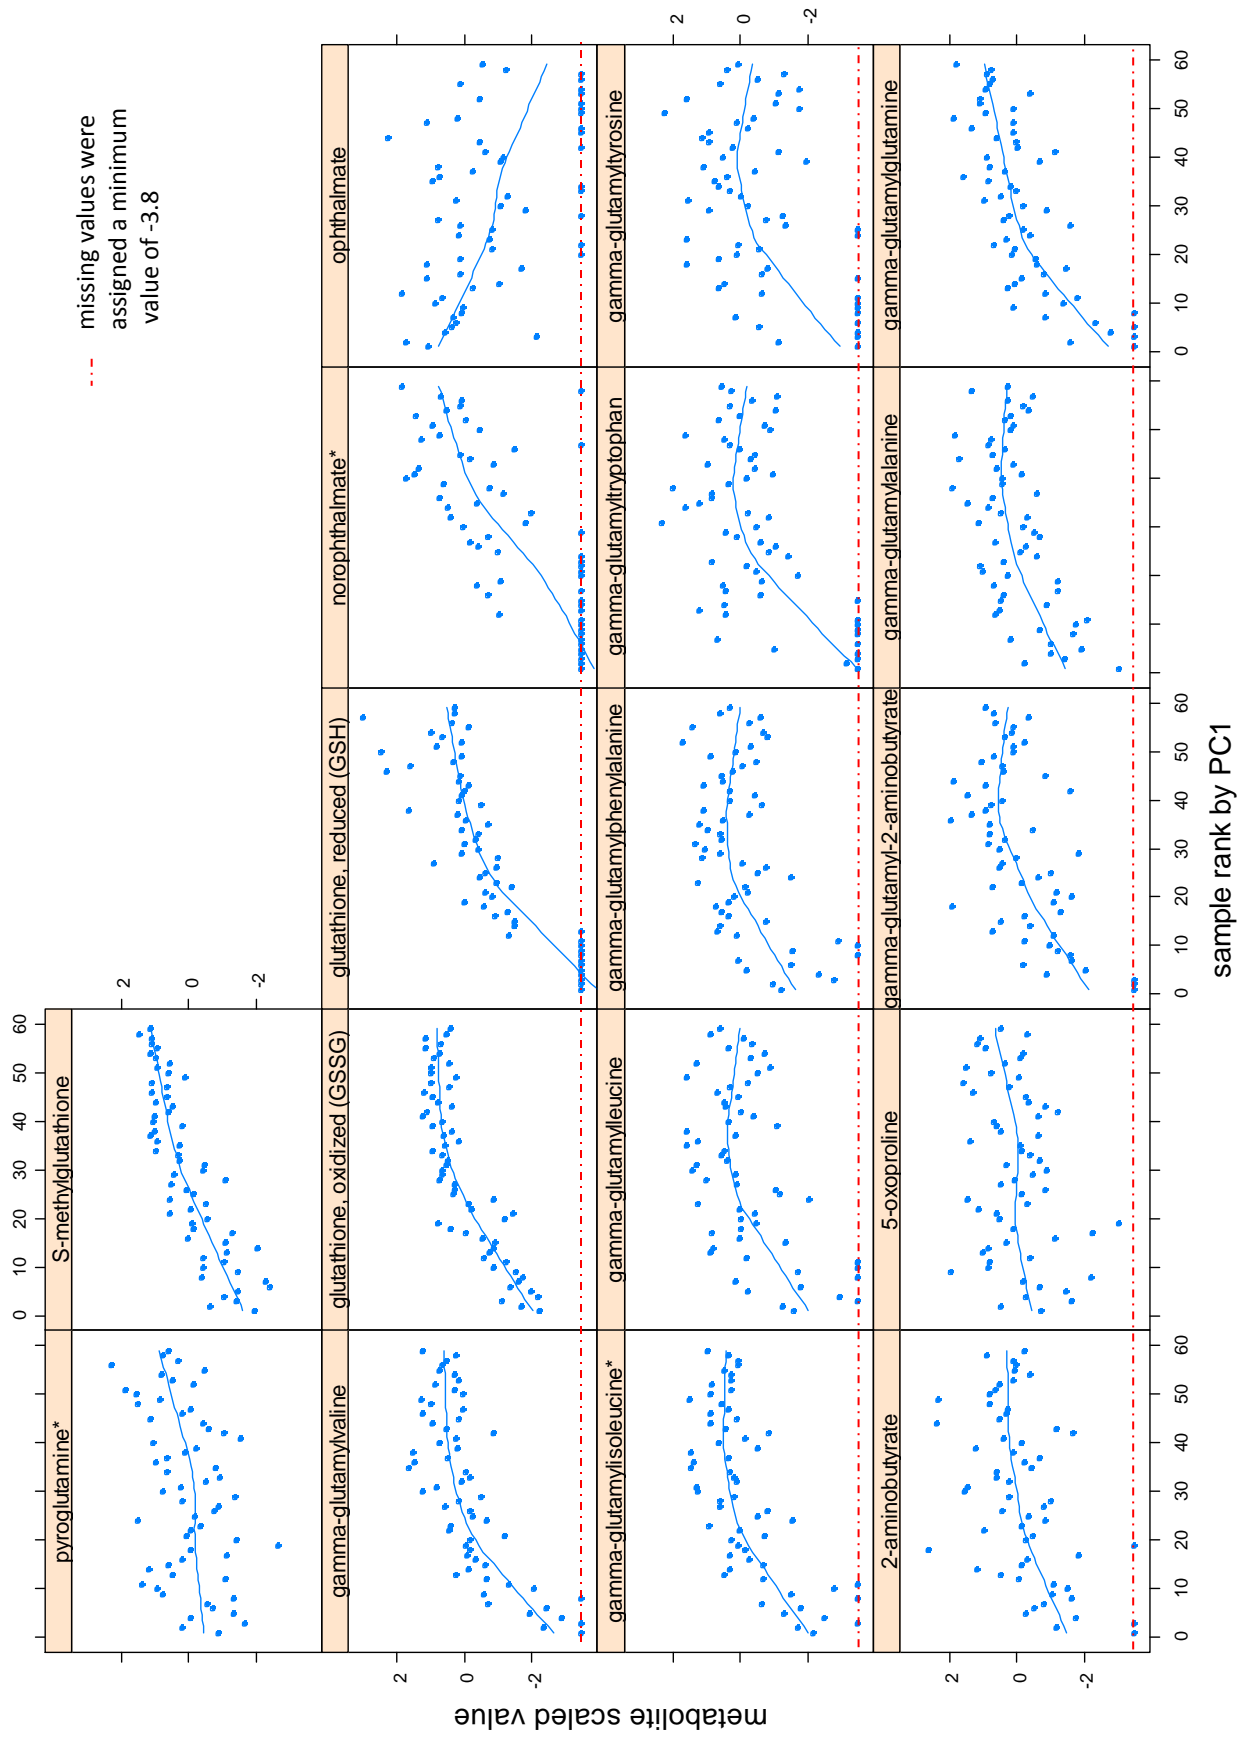

## dipeptides

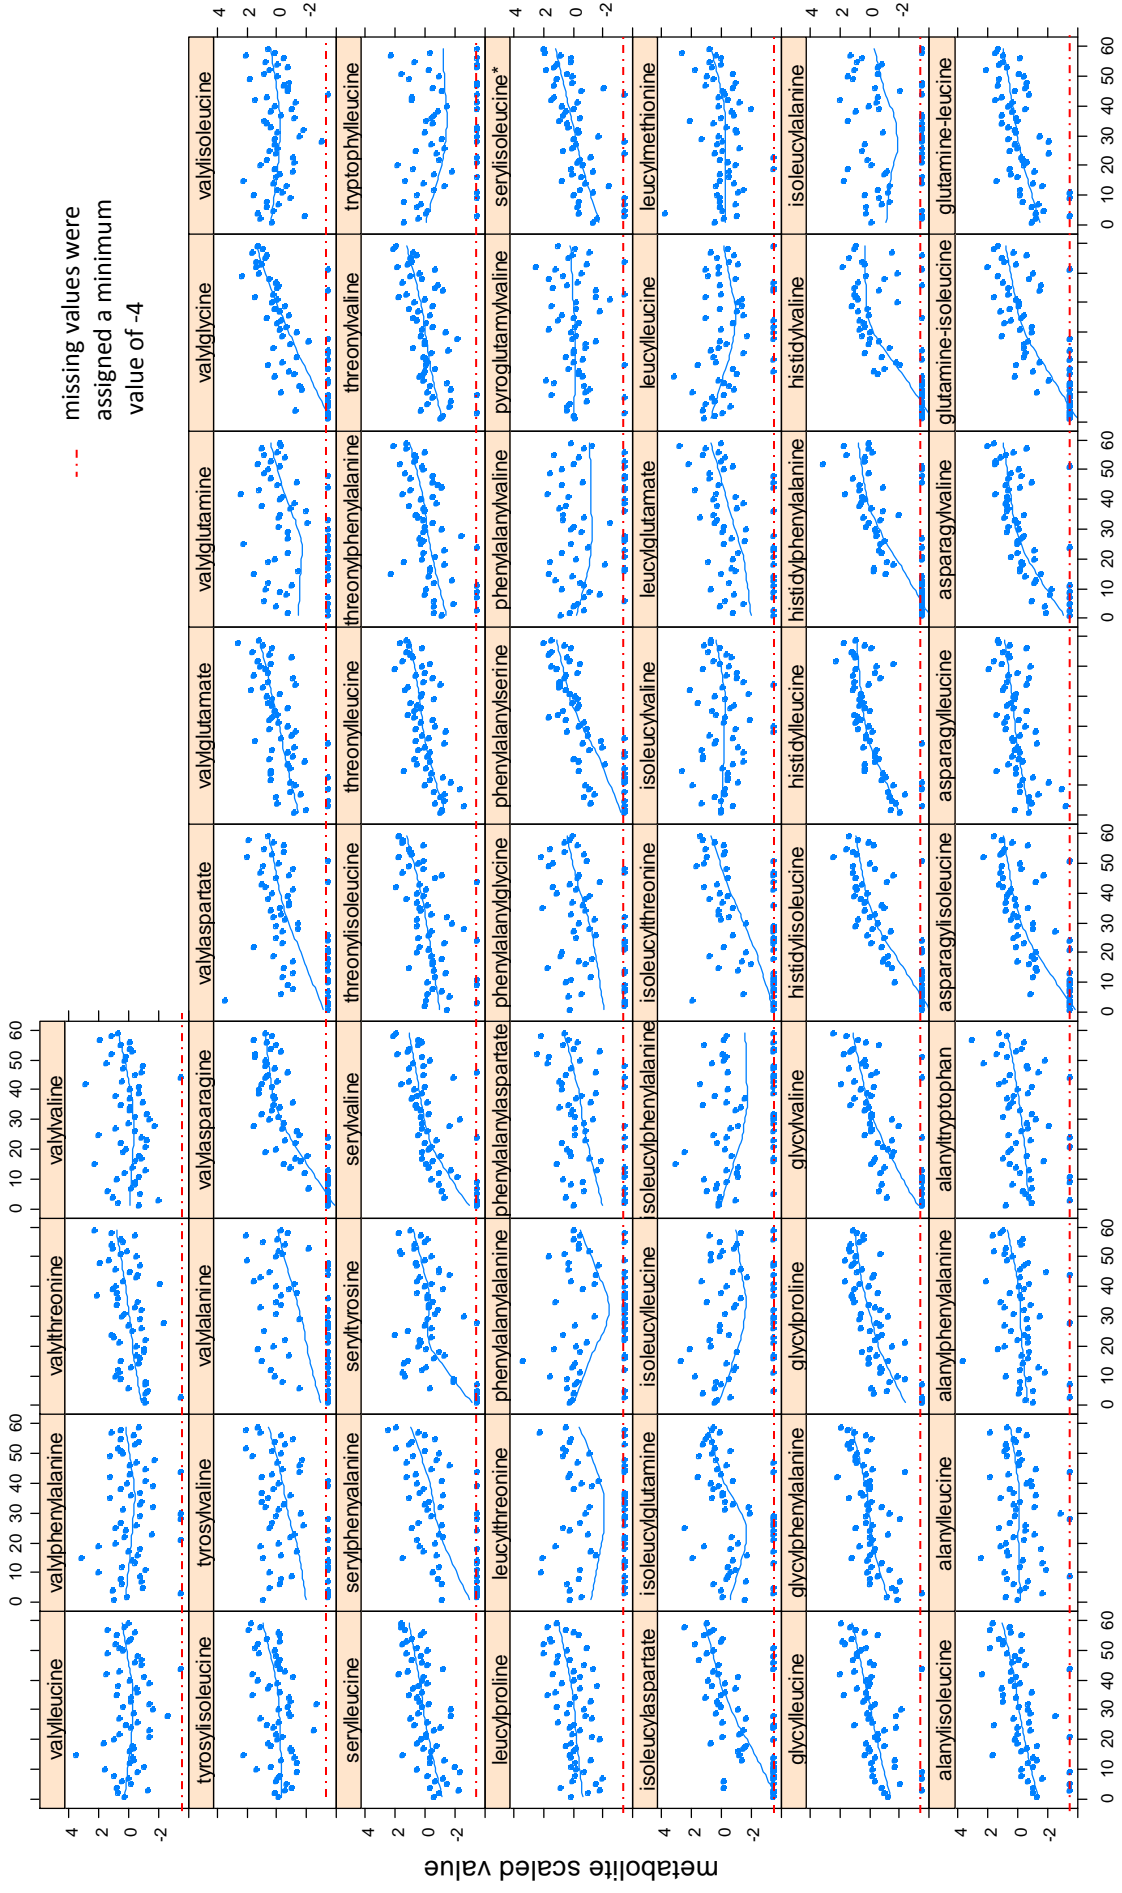

--- missing values were assigned a minimum value of -4

sample rank by PC1

--- missing values were assigned a minimum value of -3

## polyamines and polyamine degradation

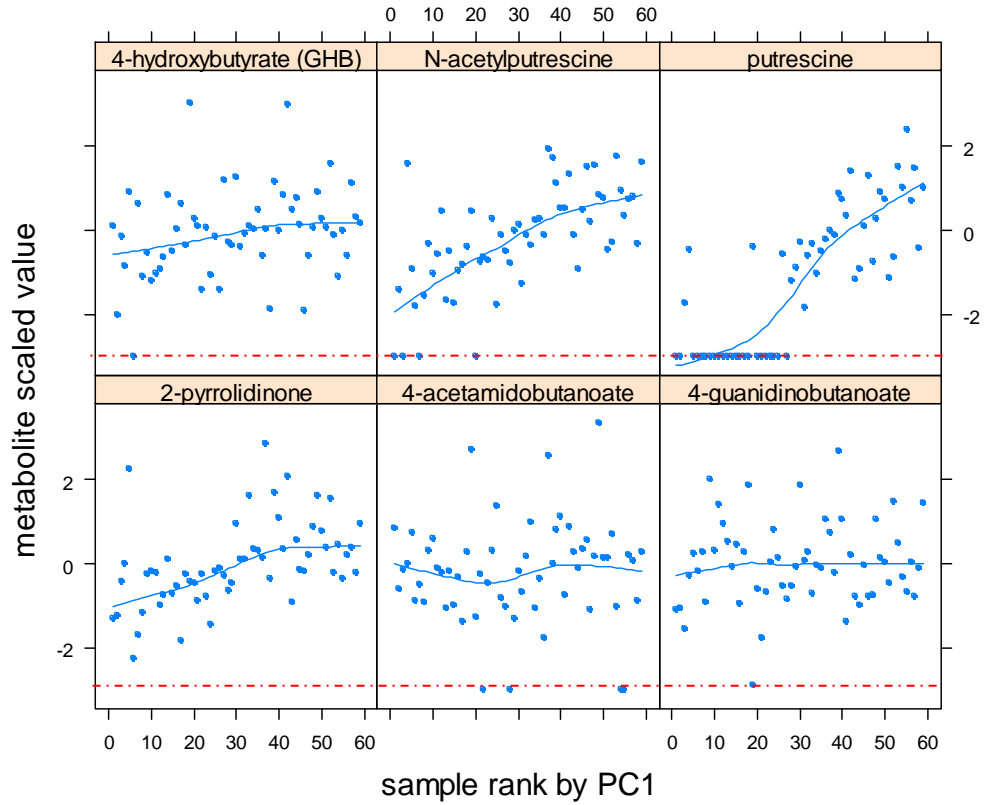

## tannins

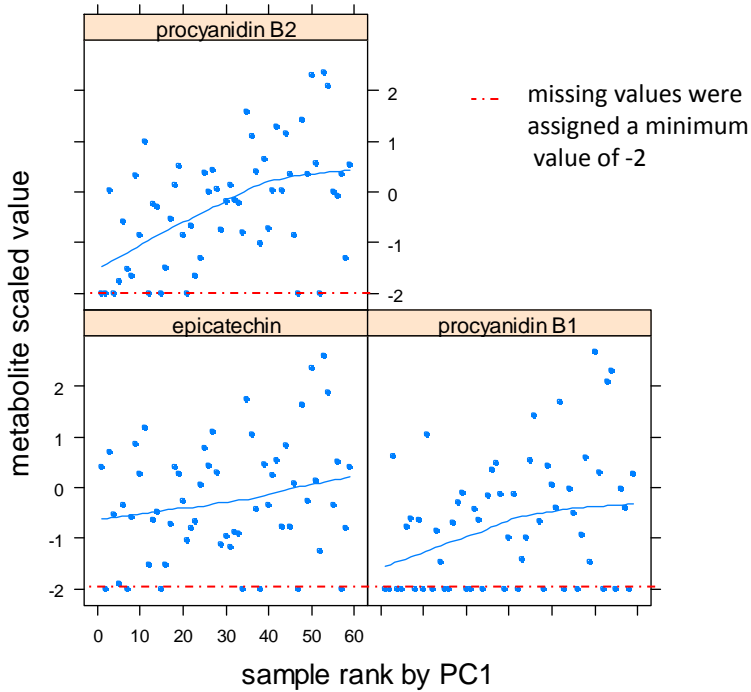

# energy metabolism

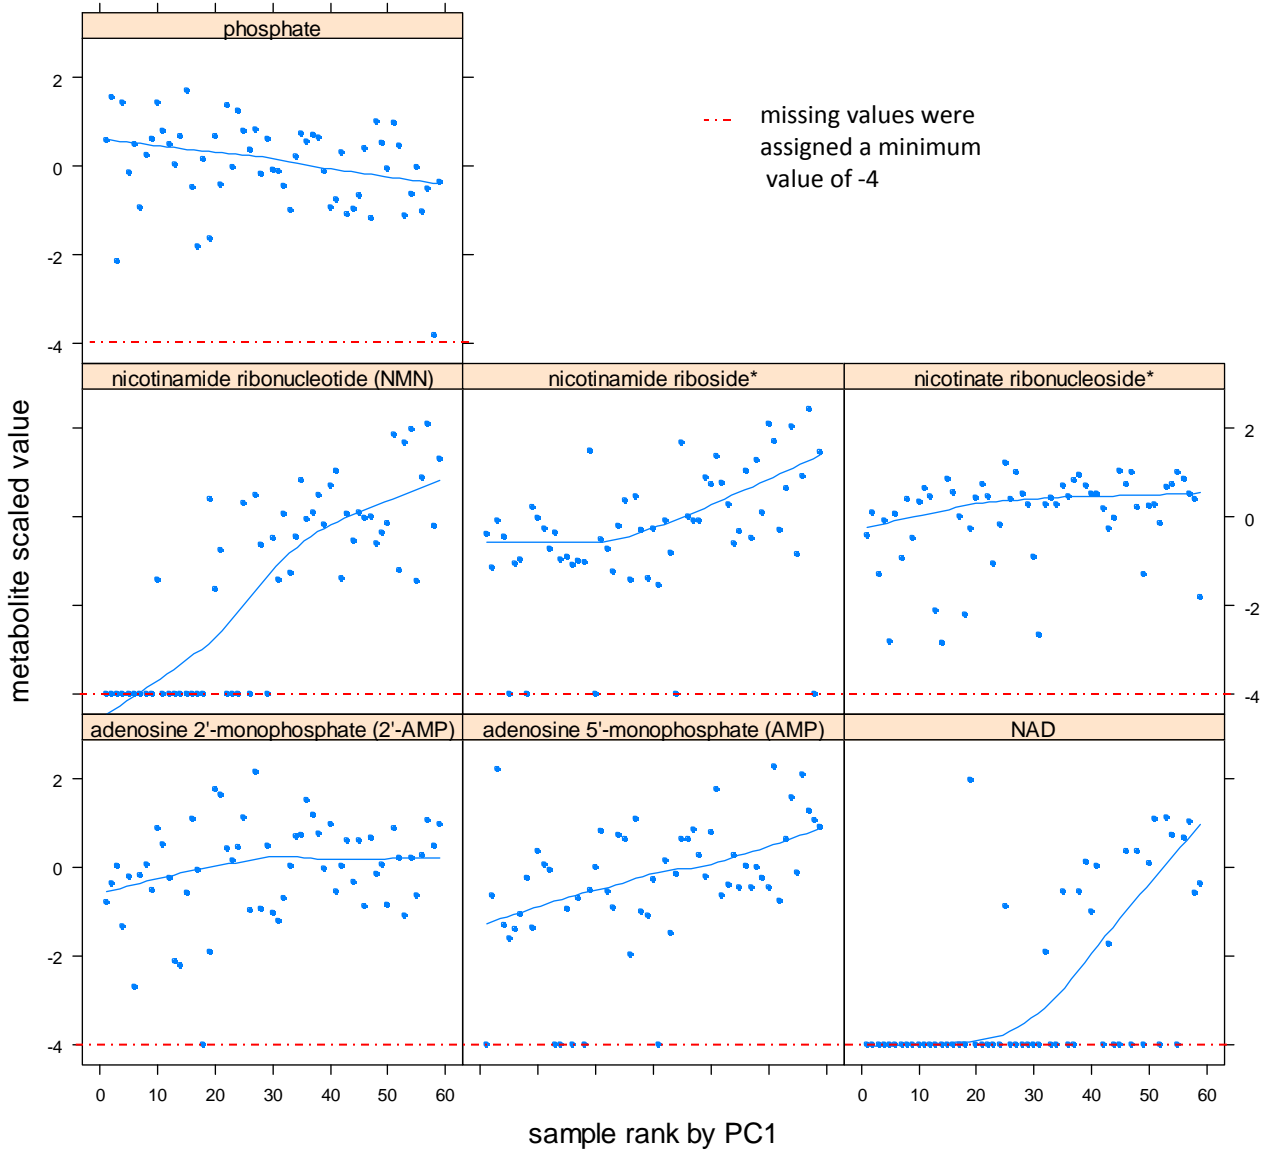

--- missing values were assigned a minimum value of -5

### acetylated amino acids

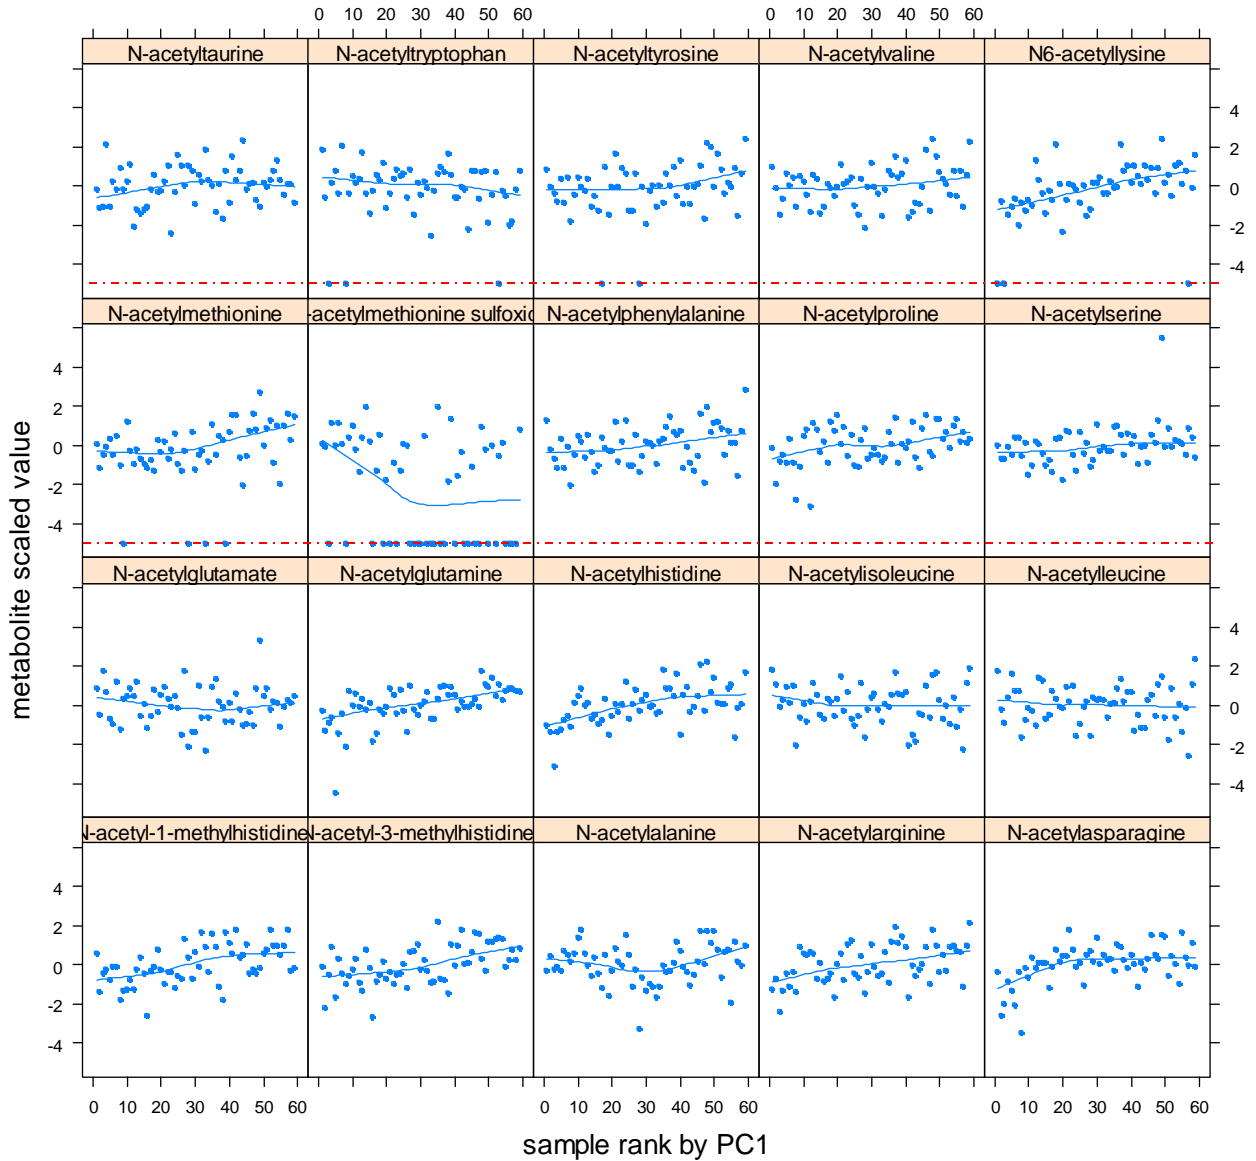

## lysophospholipids

--- missing values were assigned a minimum value of -3

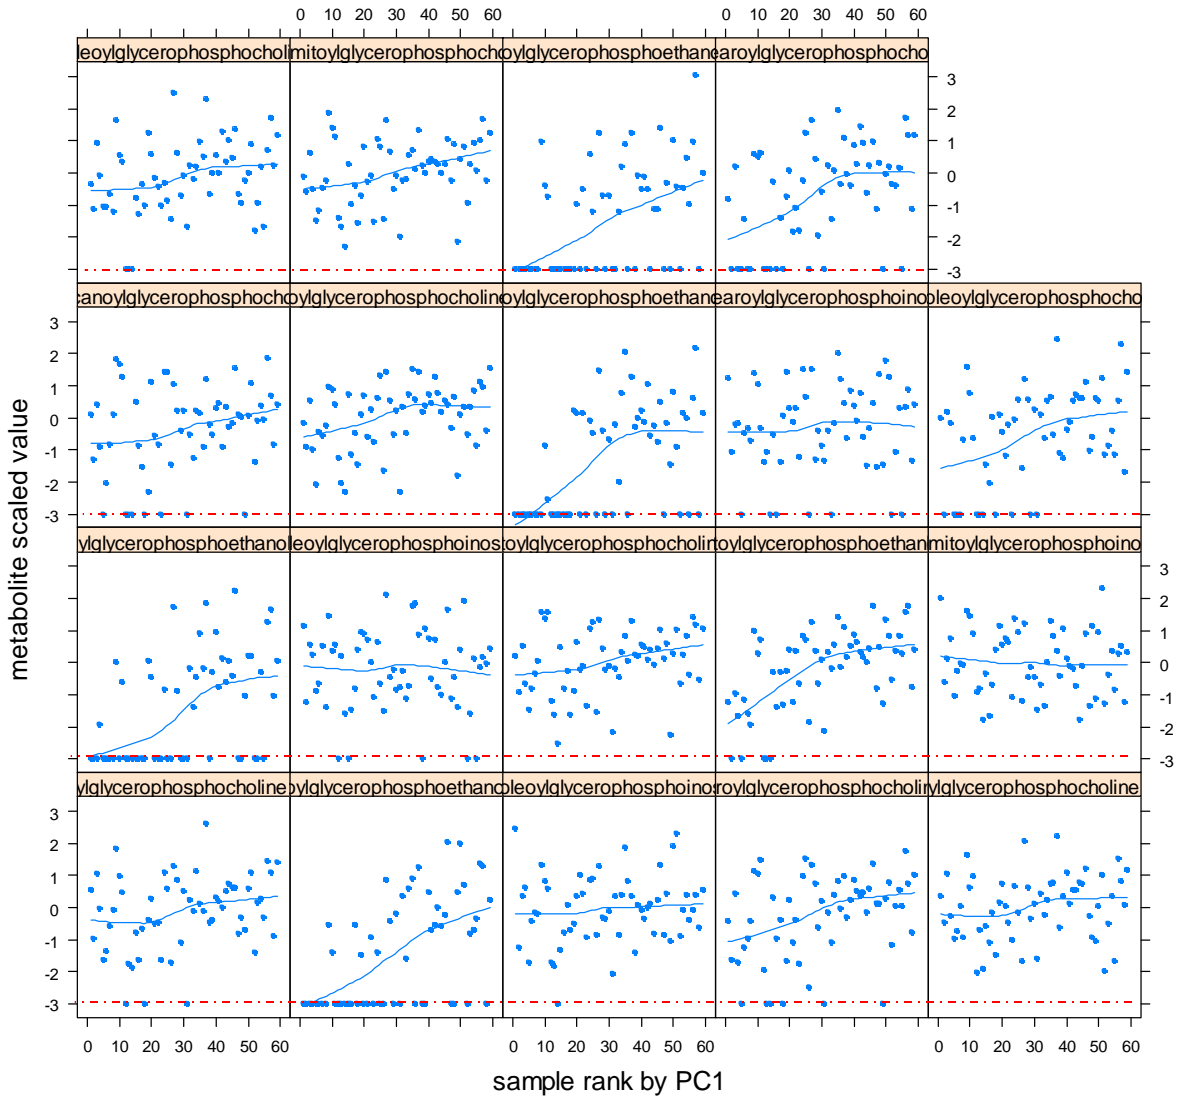

## non-reducing sugars

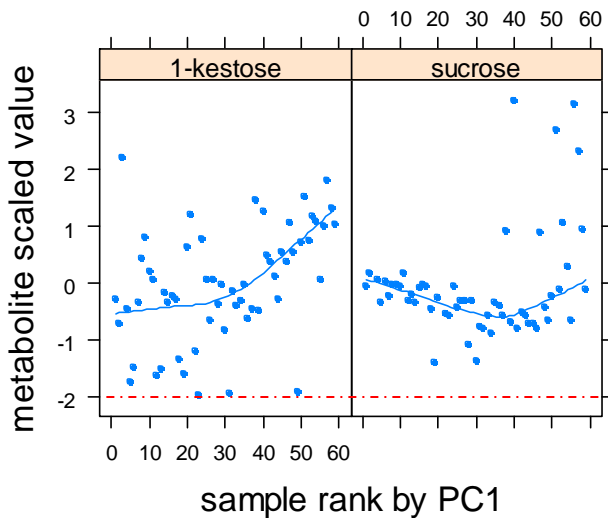

--- missing values were assigned a minimum value of -2



# hormones

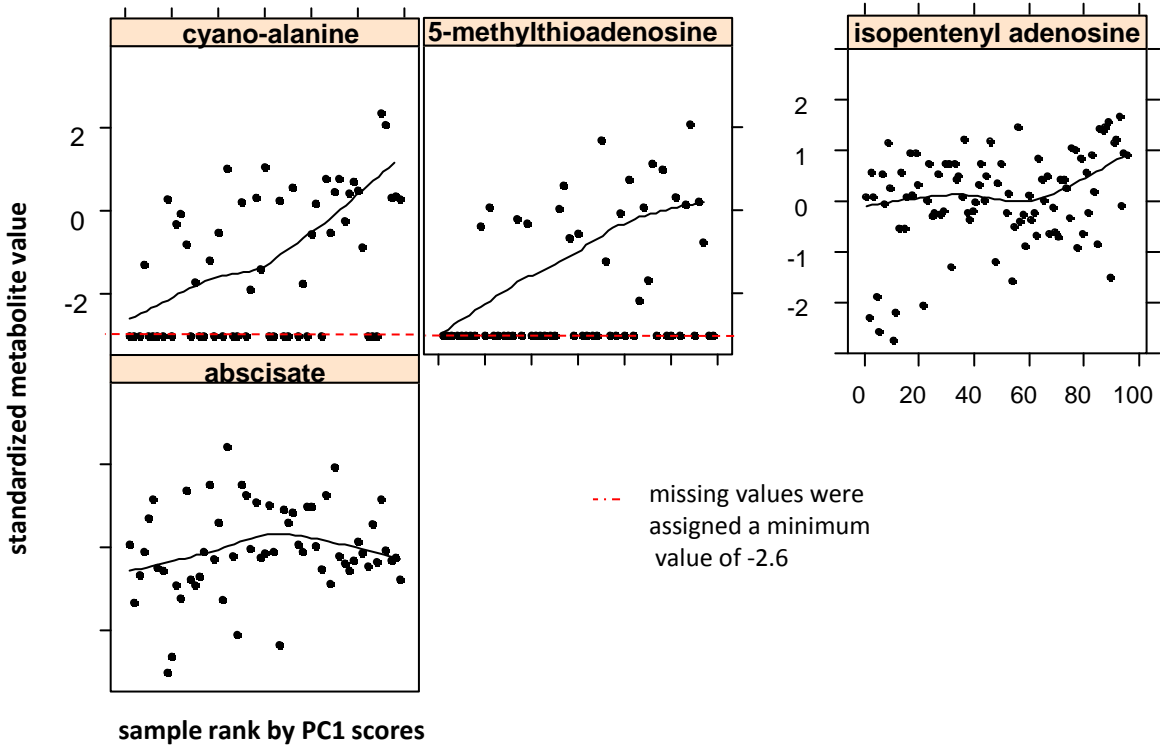

--- missing values were assigned a minimum value of -5

### nucleic acid and tRNA nucleosides

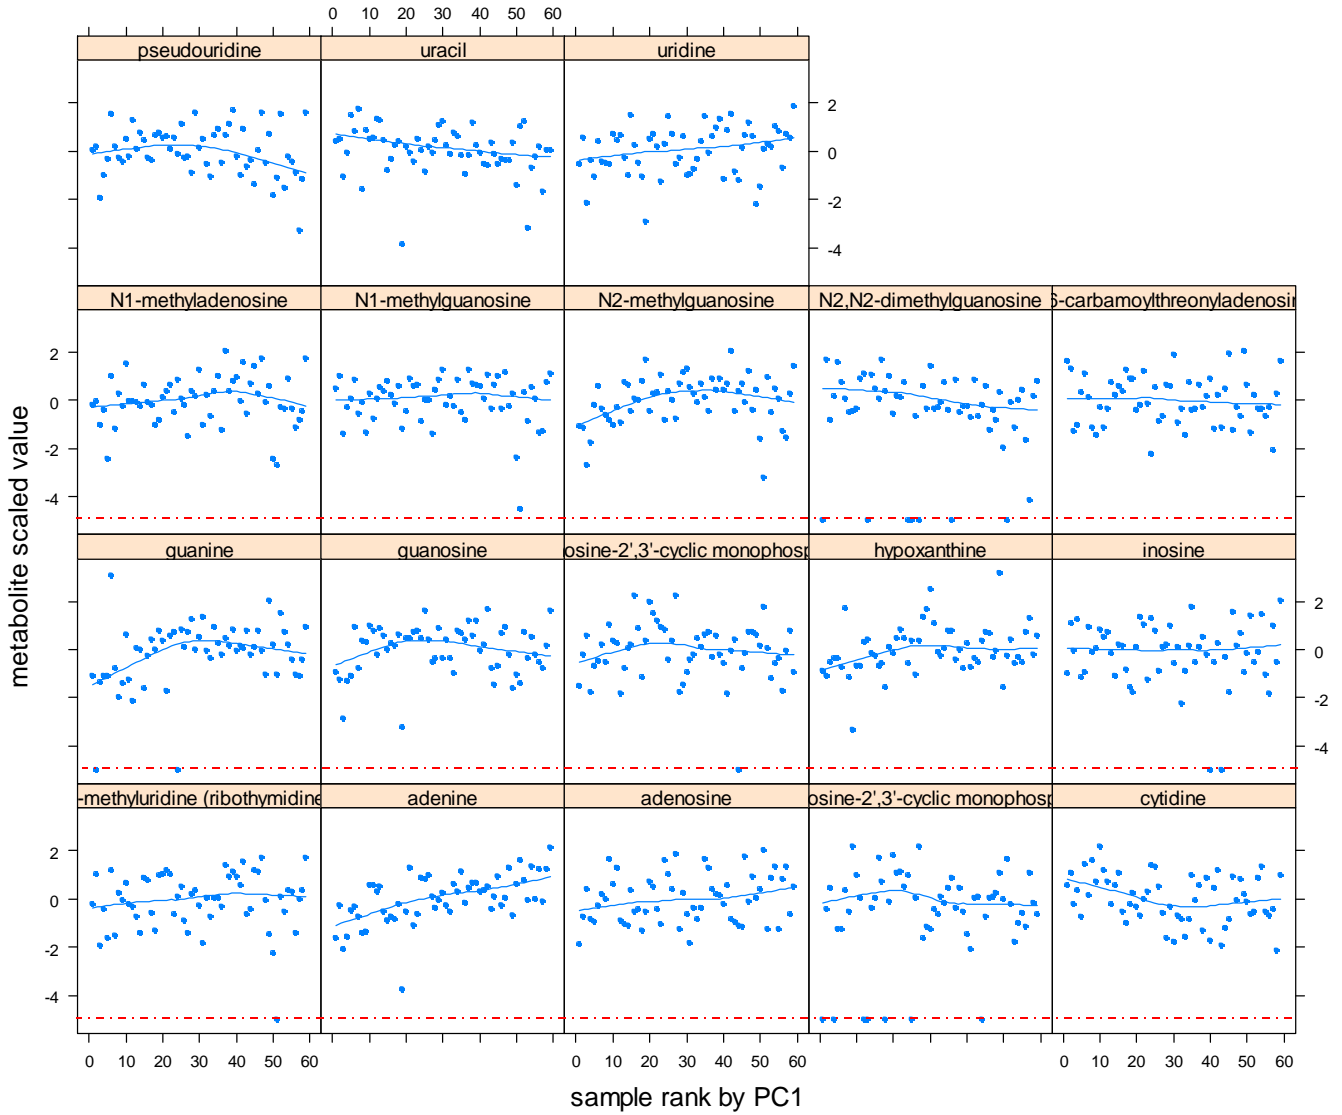

--- missing values were assigned a minimum value of -3

### general phenylpropanoid pathway

0 10 20 30 40 50 60

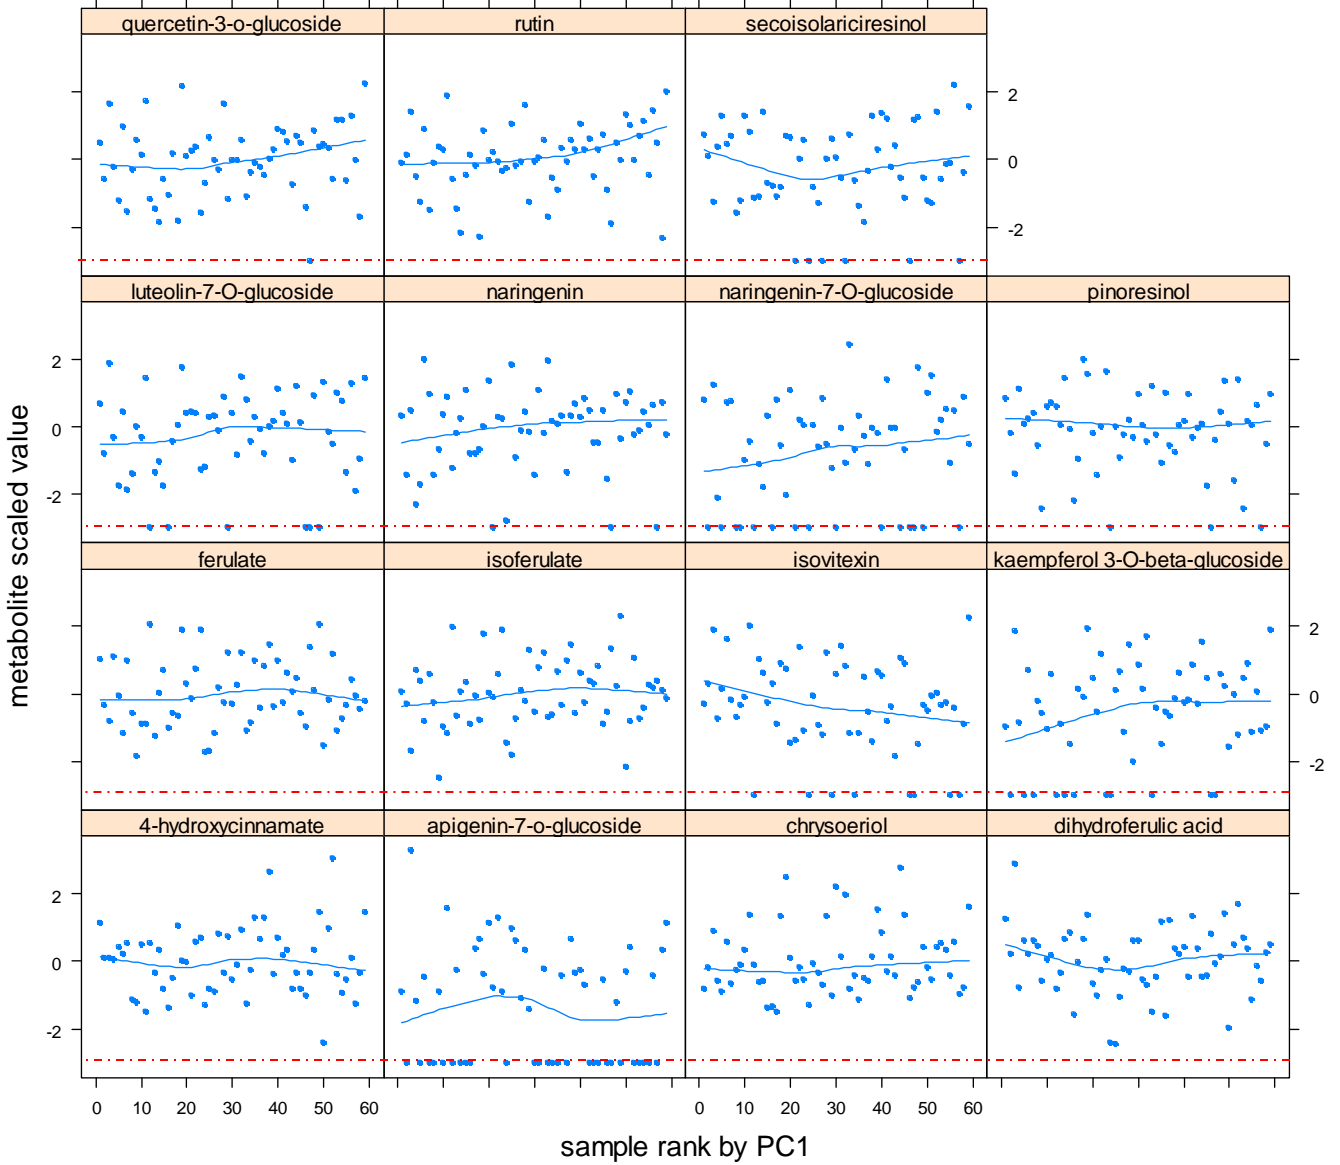

# vitamins

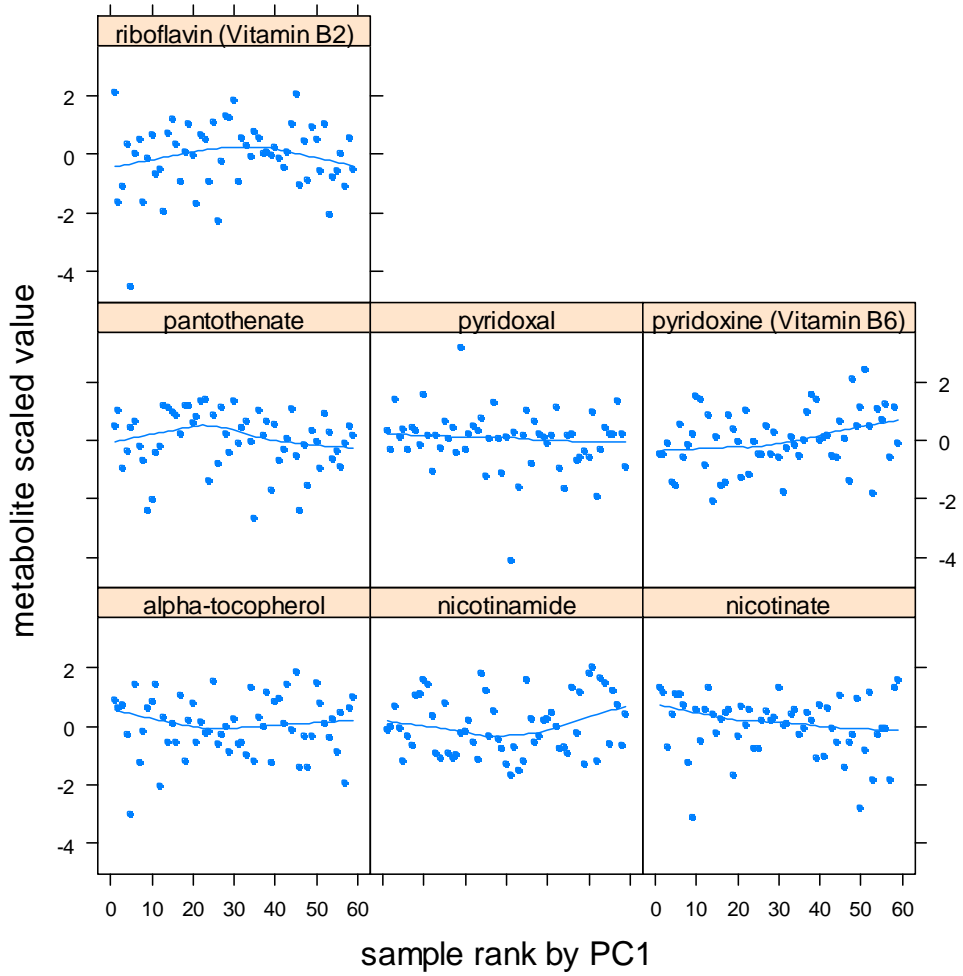

# sphingoid bases

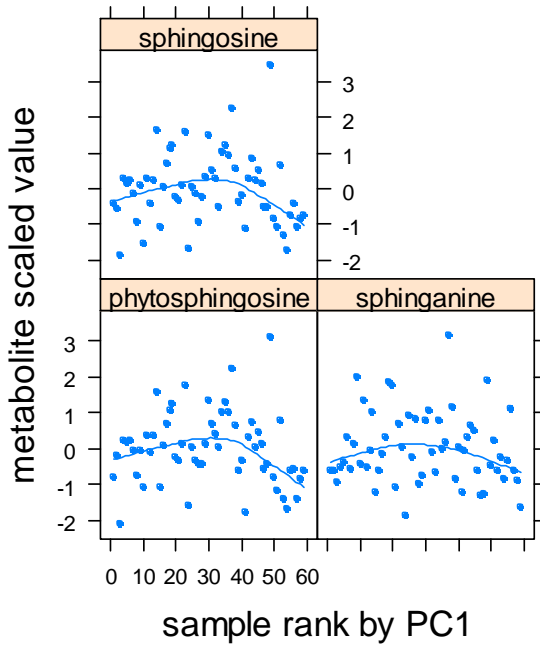

# TCA

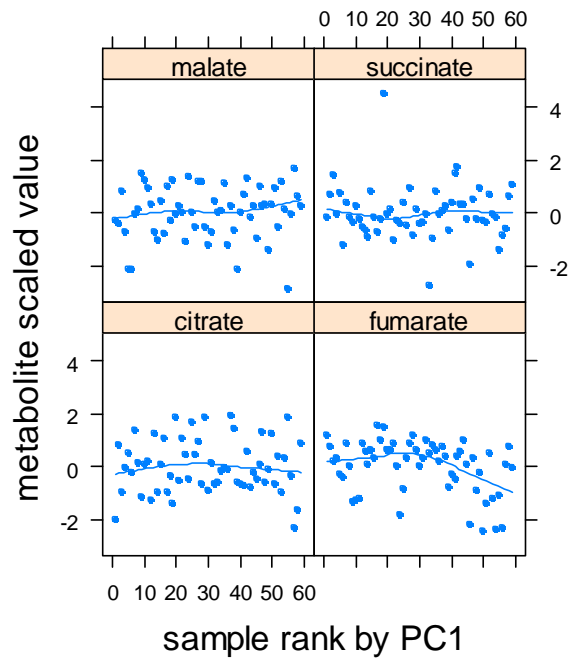

# lysophospholipid degradation

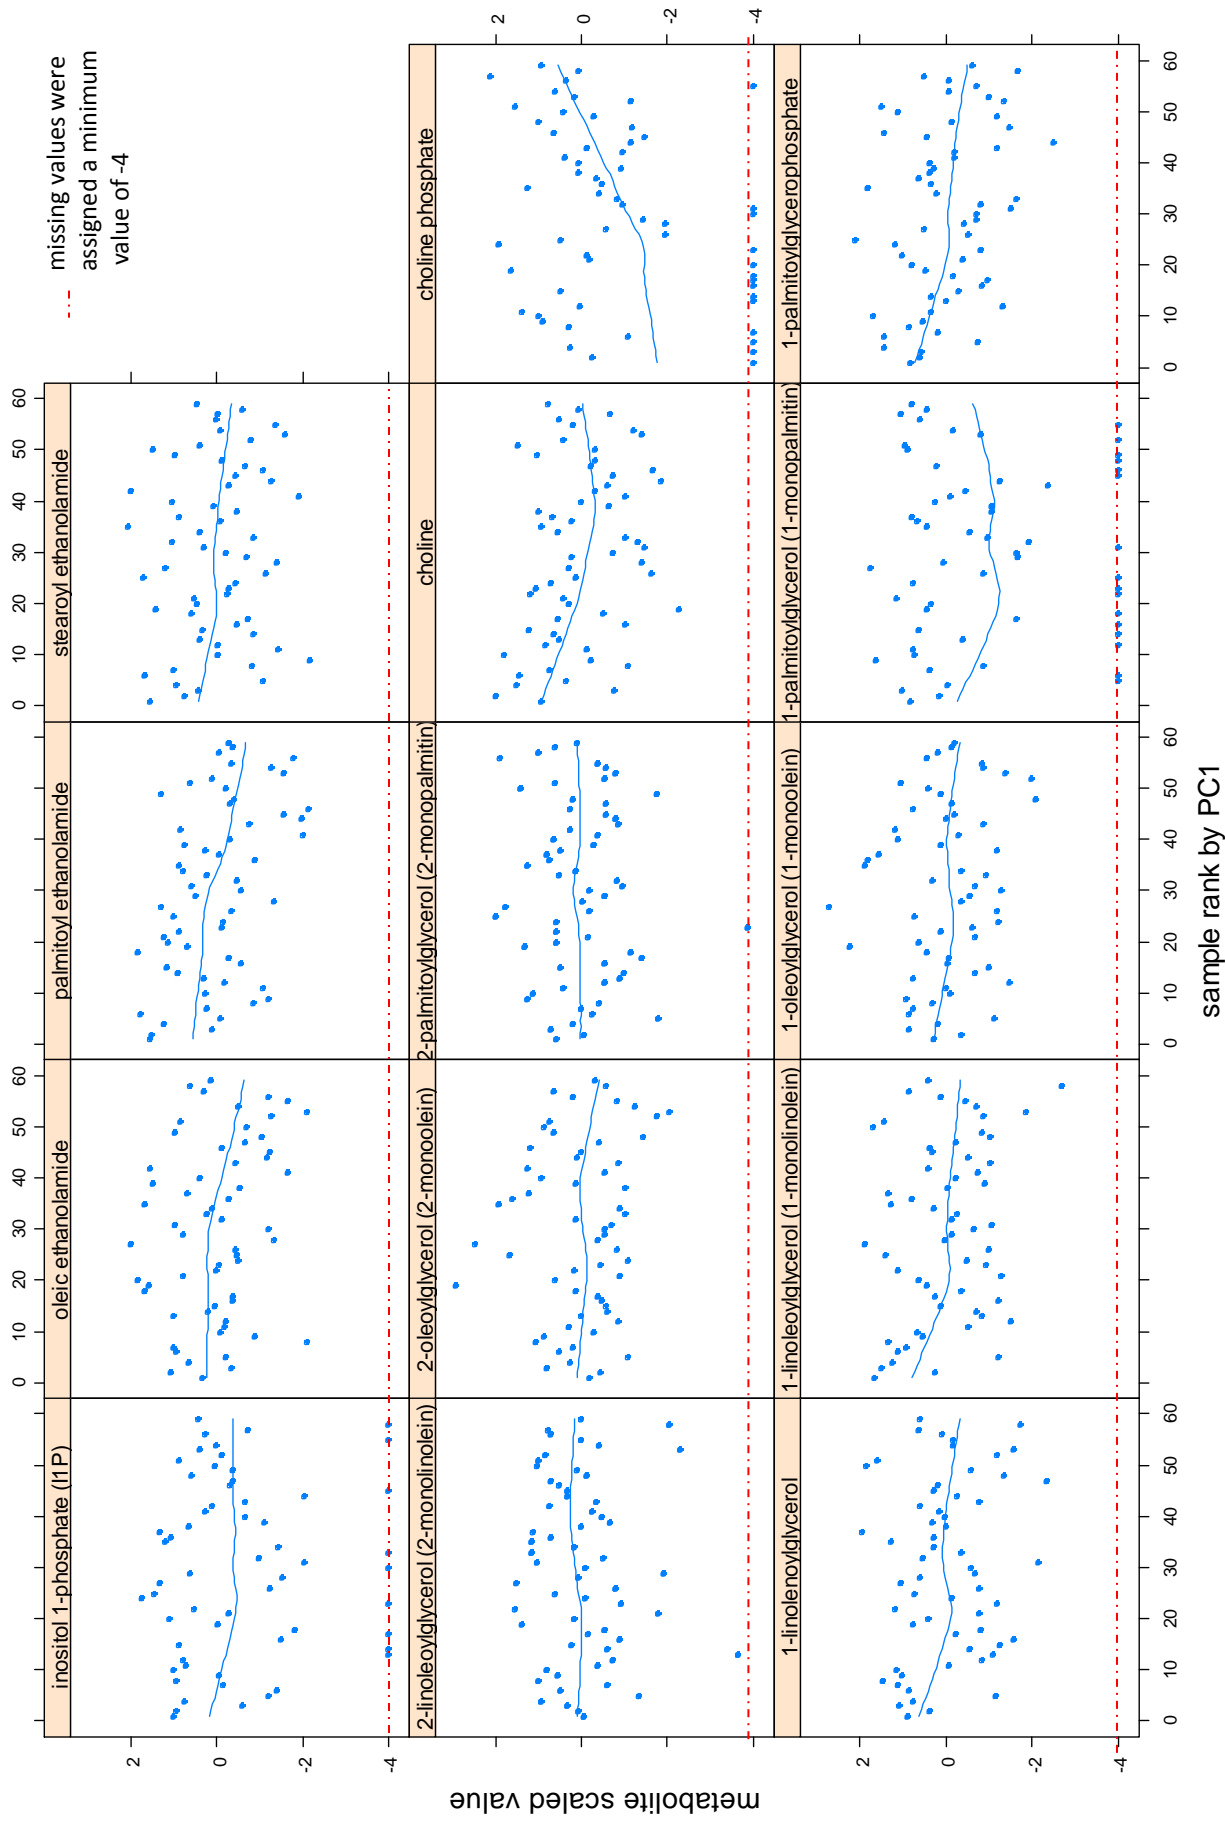

--- missing values were assigned a minimum value of -4.5

### reducing sugars and derivative lactones, acids and alcohols

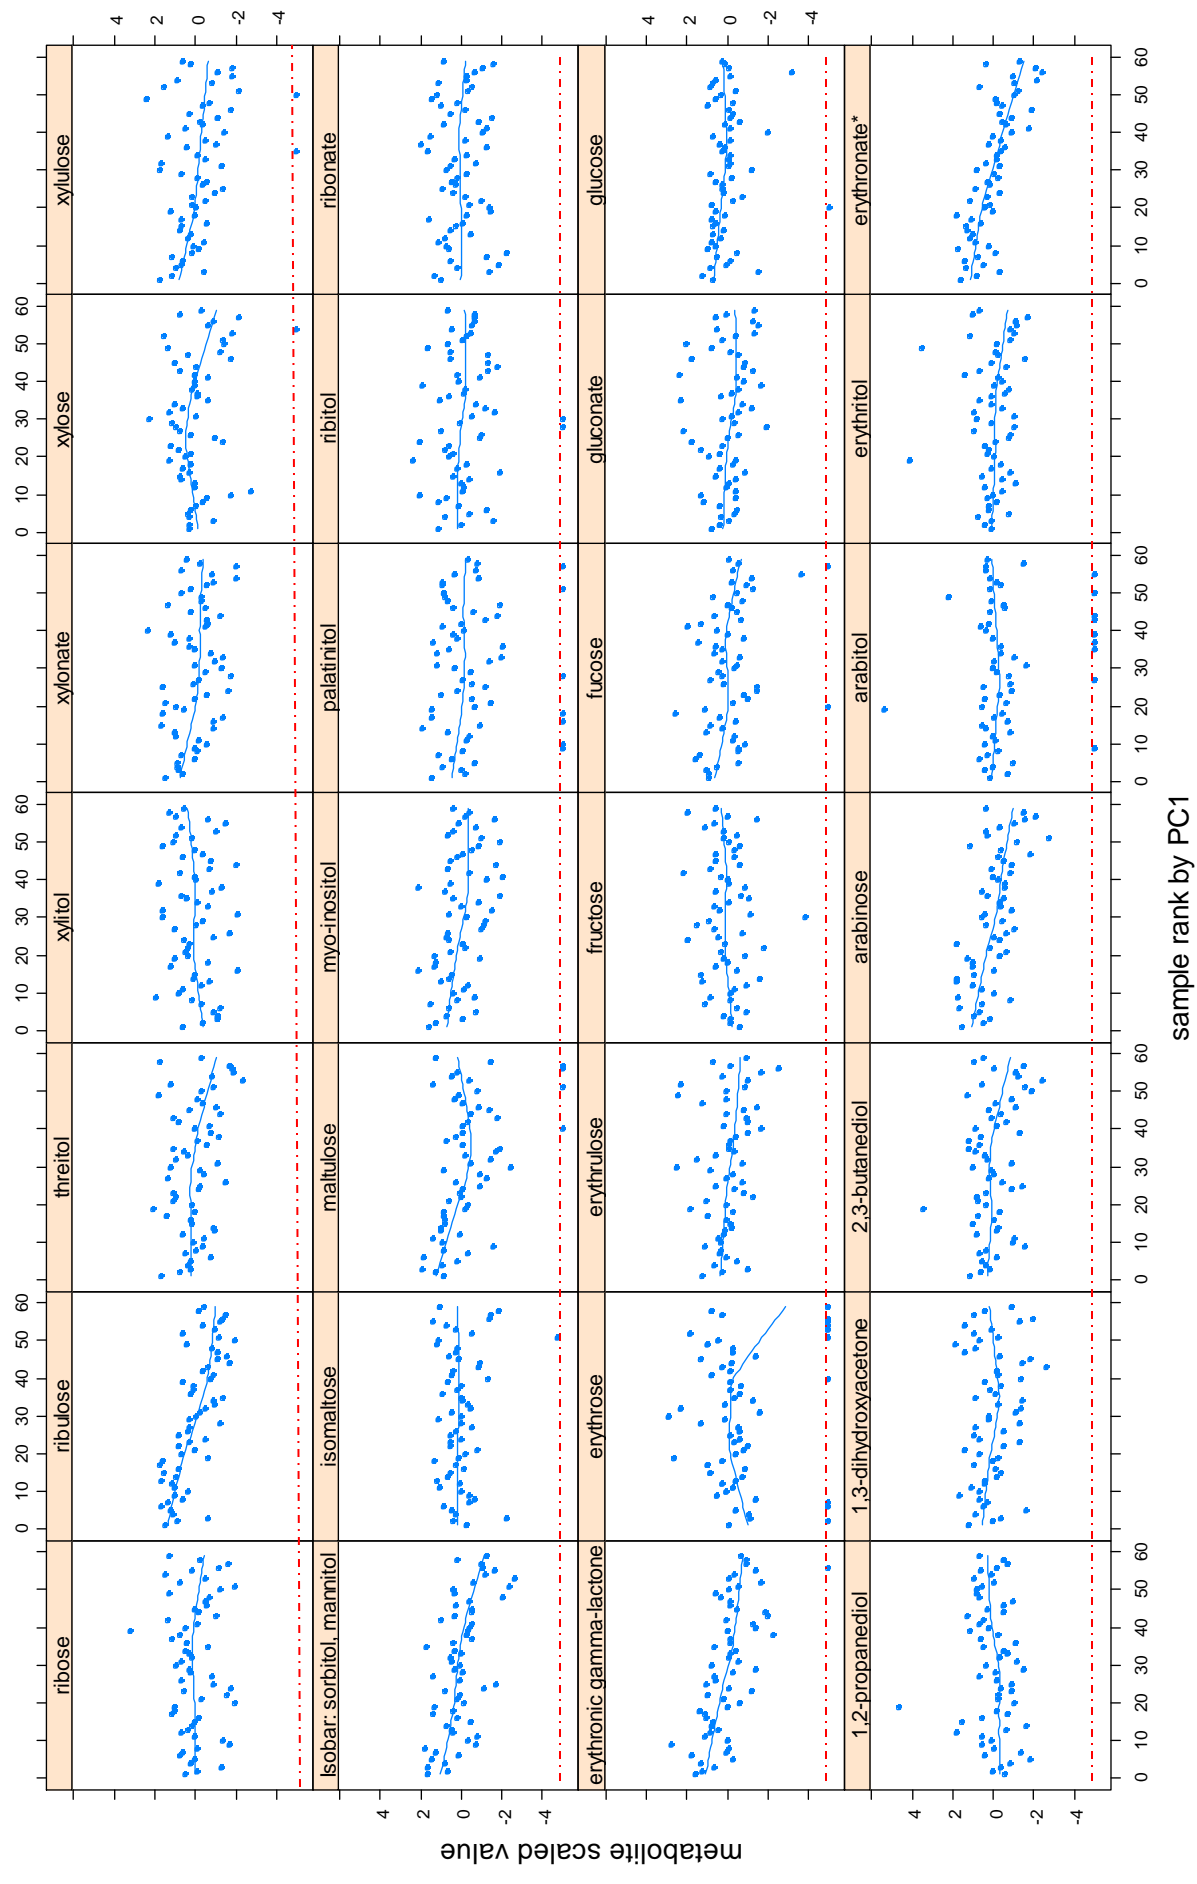

sample rank by PC1

# unsaturated fatty acids and oxylipins

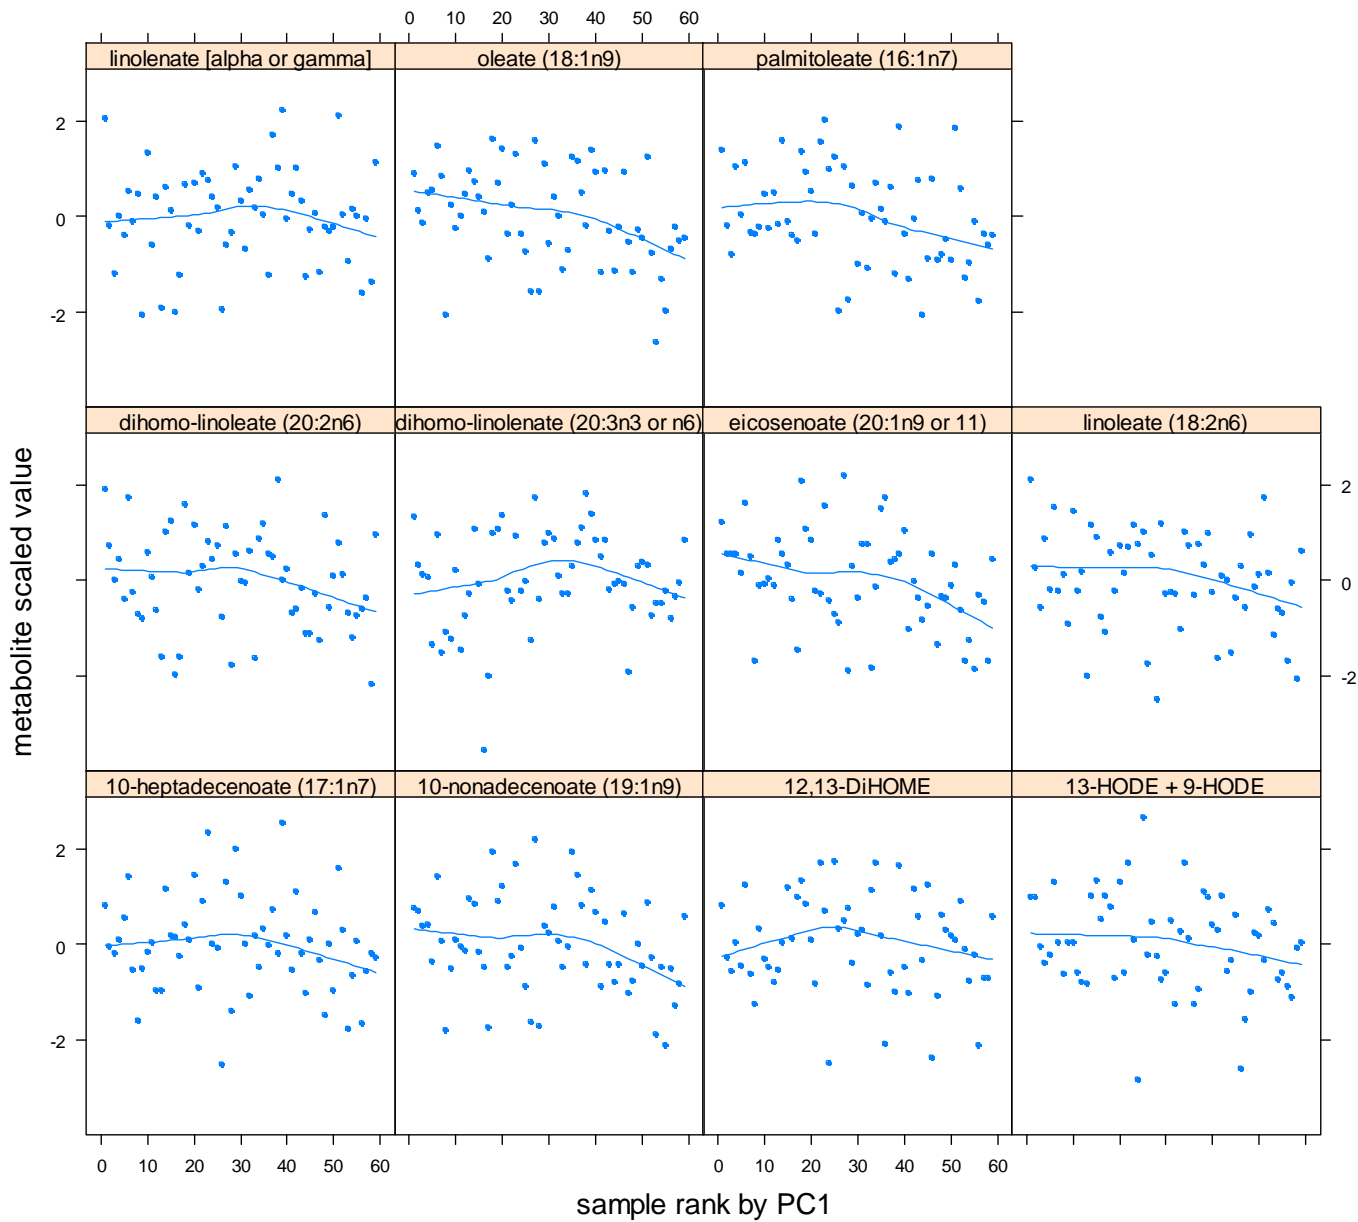

--- missing values were assigned a minimum value of -4

## polymethoxycinnamates, derivative hydroxybenzoates and VOCs

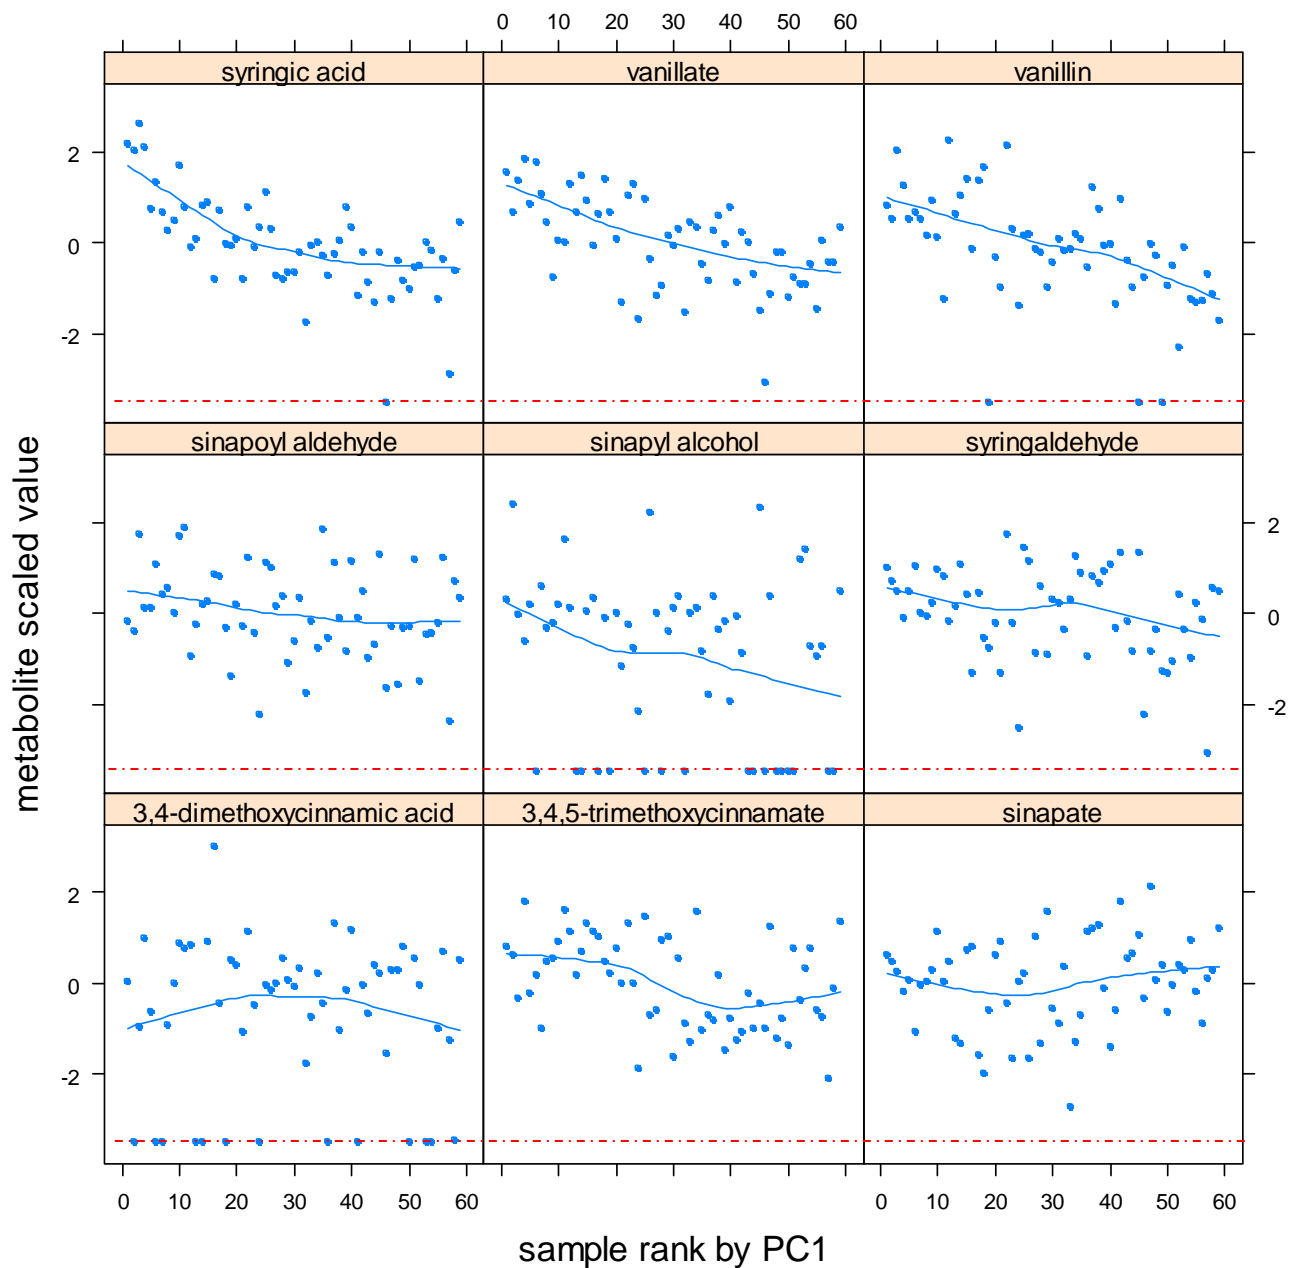



# degradation activity and amino acid VOCs

--- missing values were assigned a minimum value of -4

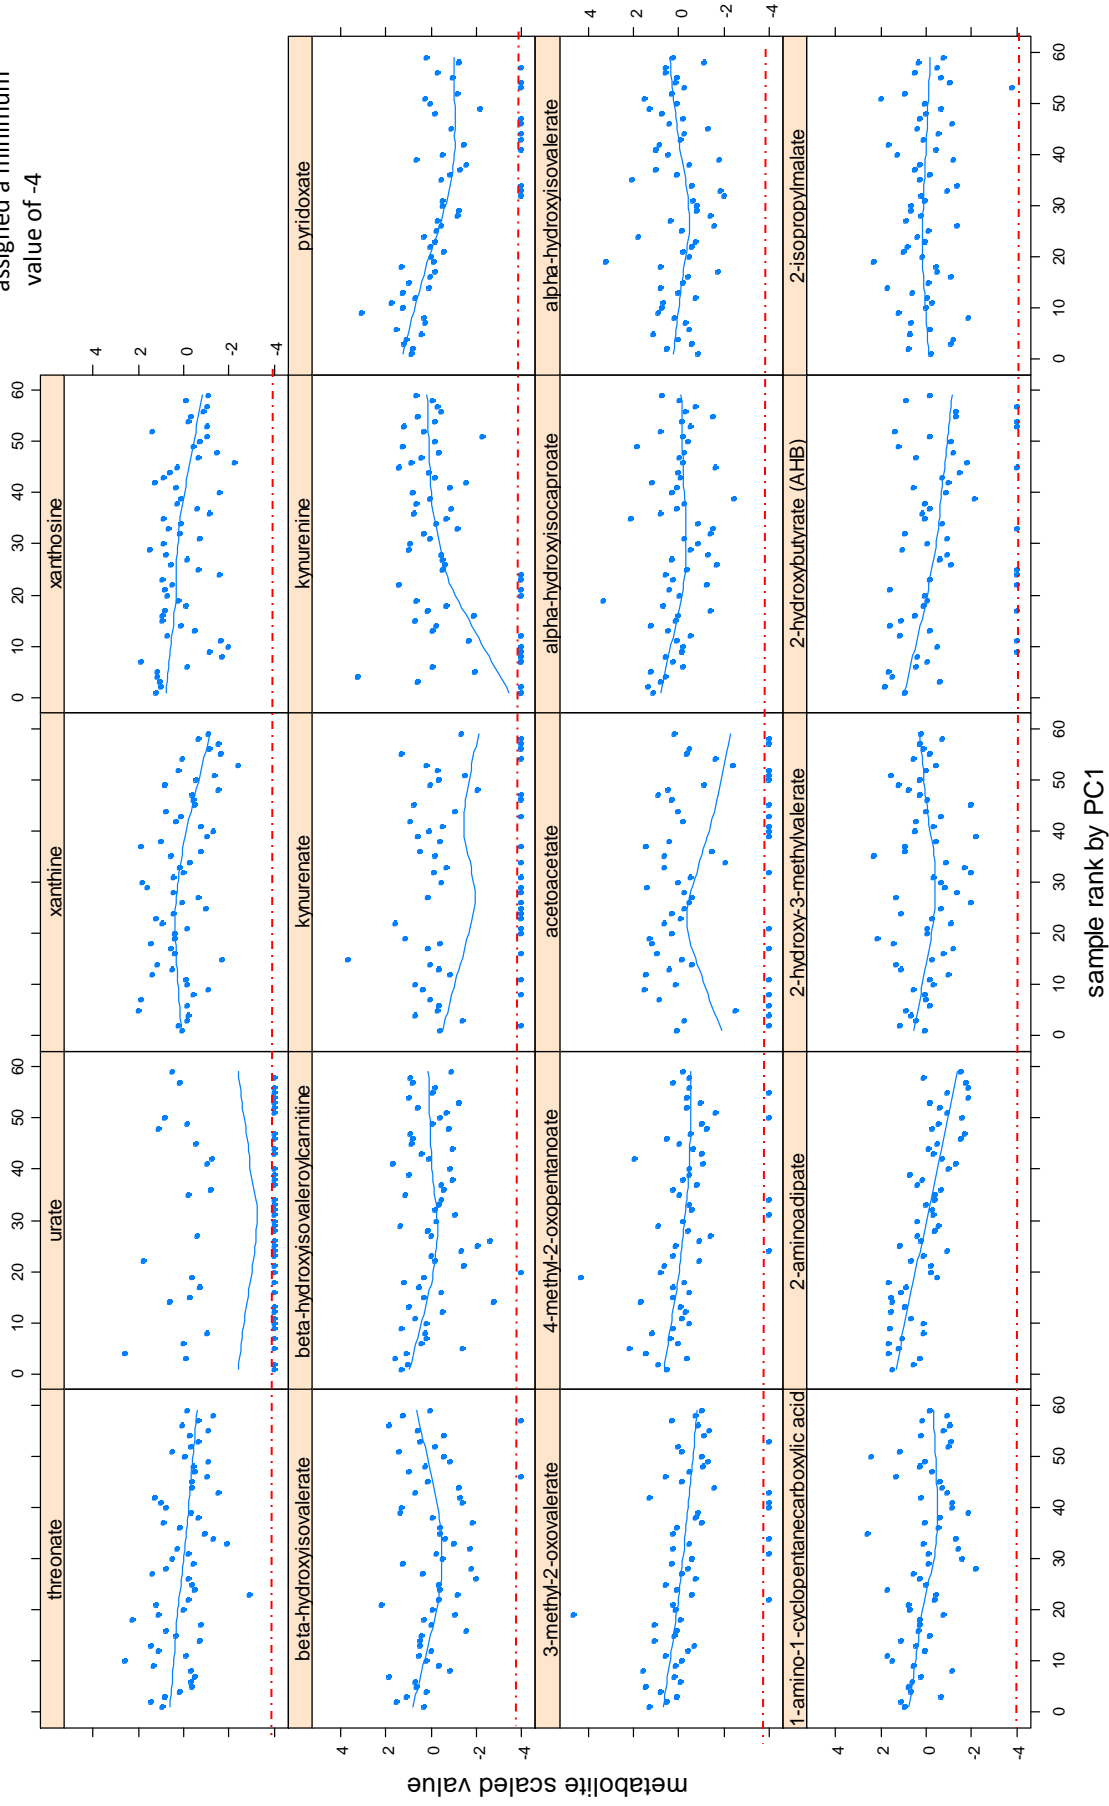

### rRNA nucleosides

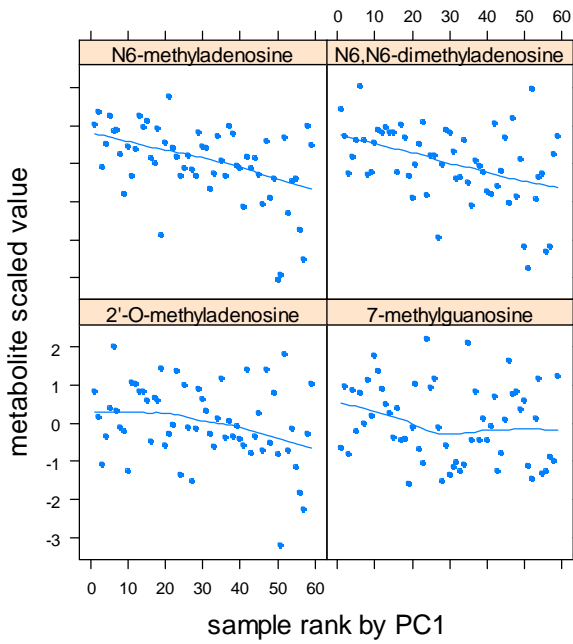

### sugar dehydration

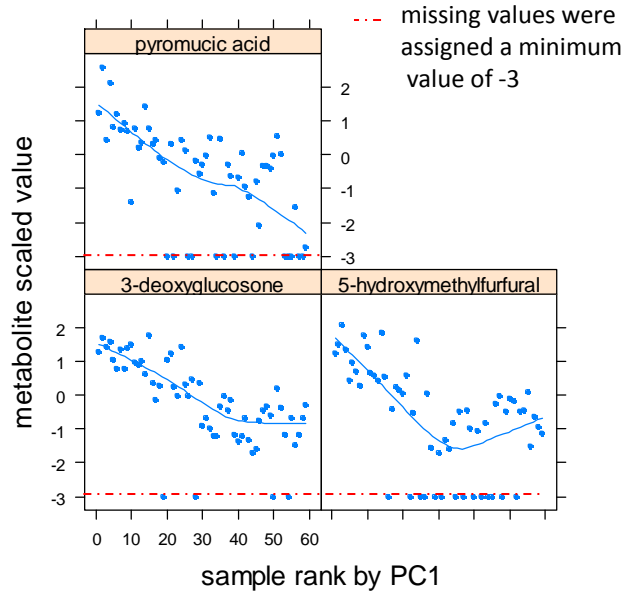

### glycolysis

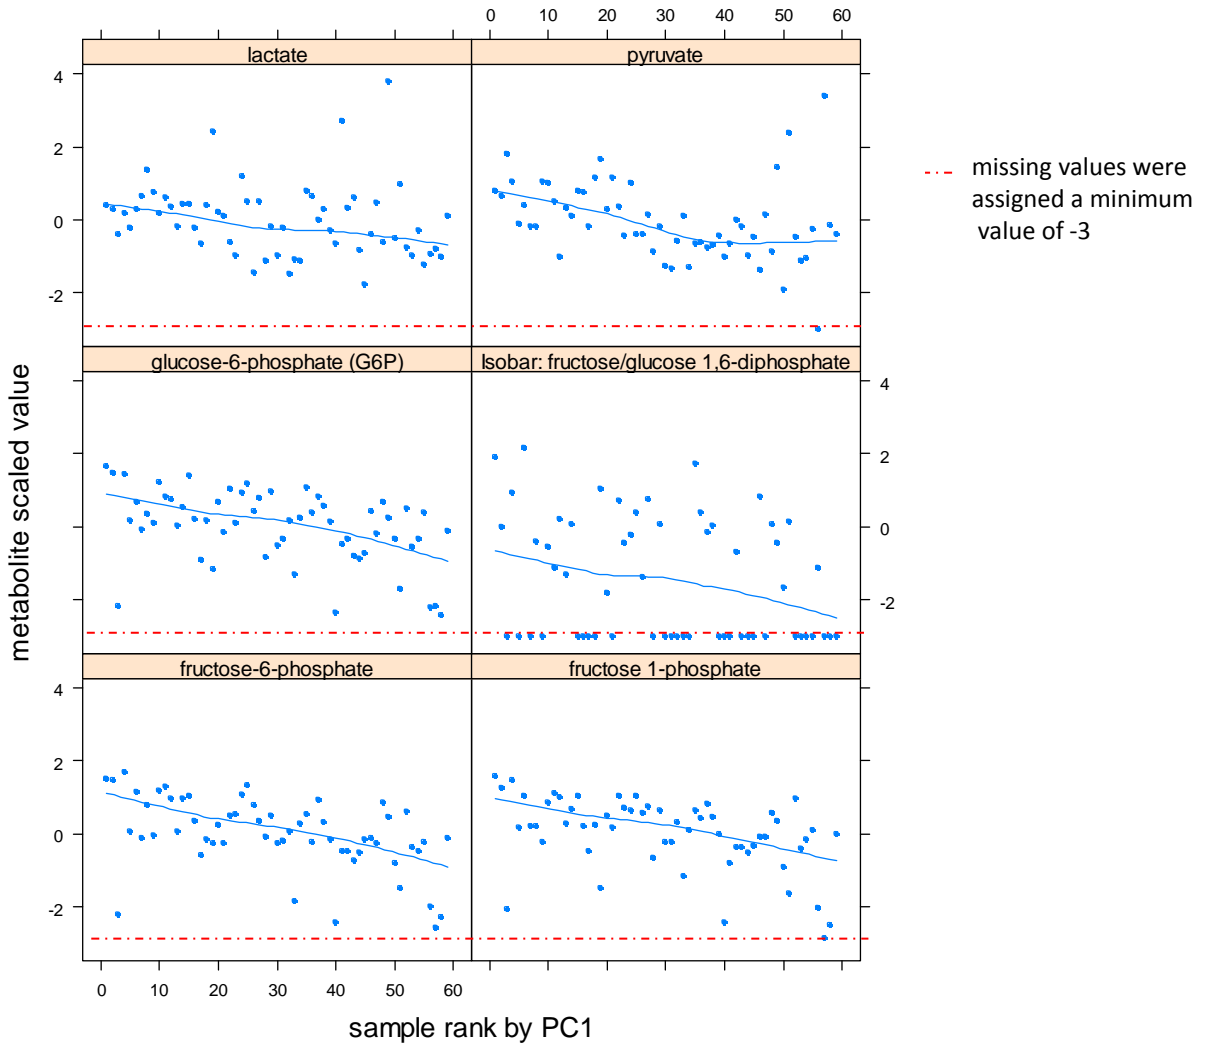

Supplement: 12870_2015_672_MOESM6_ESM.pdf [file 12870_2015_672_MOESM6_ESM.pdf]
